# Supplementary material
Source: publisher site journal article supplement (https://neobiota.pensoft.net/article/21470/download/suppl/35/)
Supplement: Supplementary file 1

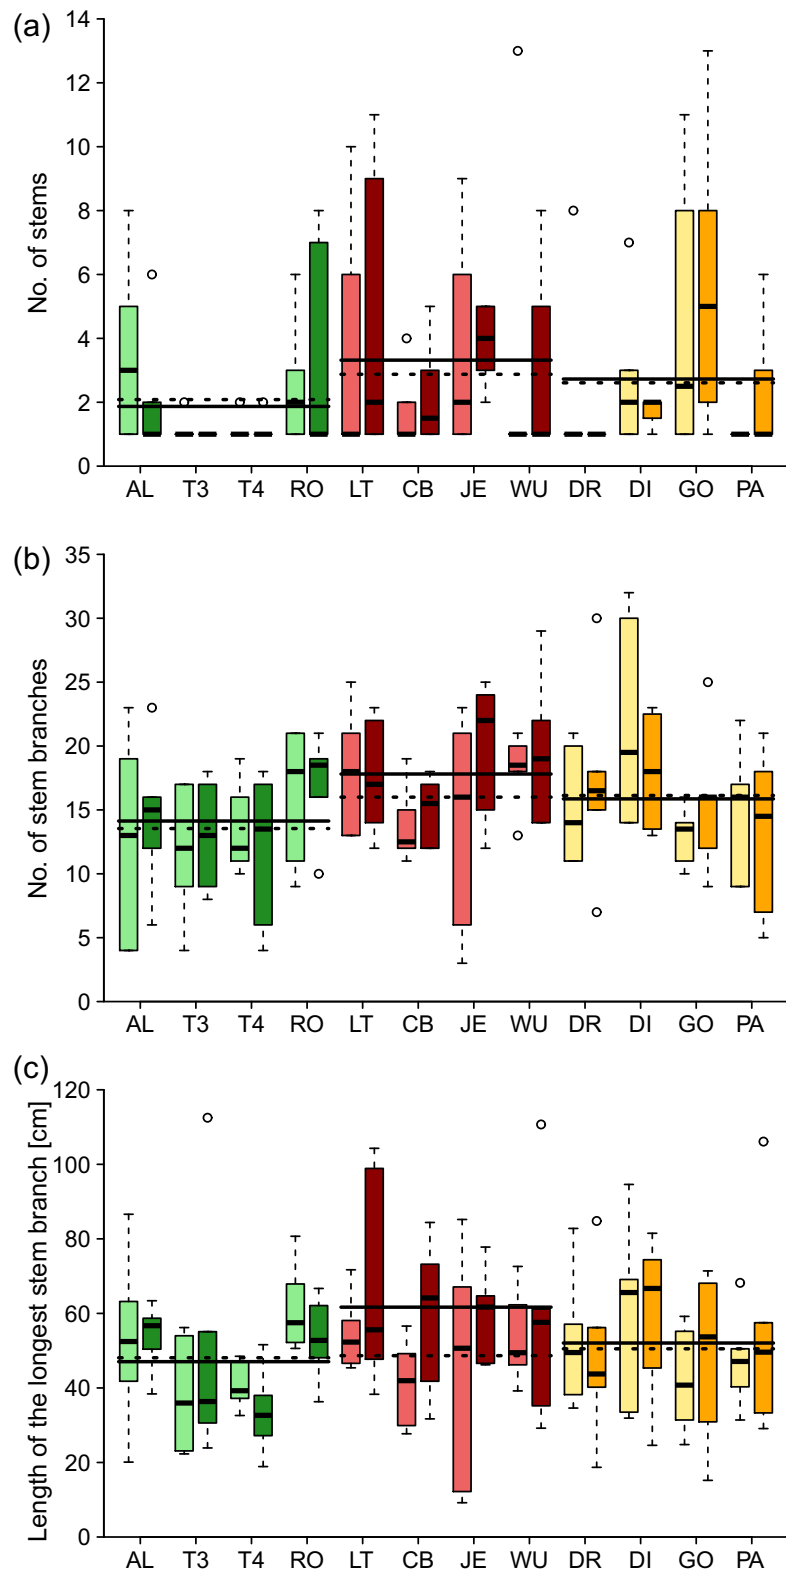

**Figure S4.** Reproduction-related traits of *Bunias orientalis* plants. Twelve populations of native (green), invasive (red), and naturalised (yellow) status were grown in a field common garden under two nitrate-fertilisation treatments, low (light shade) and high (dark shade) ( $n = 4-6$  per population and fertilisation treatment; for population codes see Table 1). Number of (a) stems and (b) stem branches, where inflorescences are located, and (c) length of the longest stem branch per plant, including all plants that were flowering. Box plots: median, 5th, 25th, 75th, 95th percentiles; open dots: outliers. Lines along four populations of similar status: status mean values for low (dashed) and high (solid) fertilisation treatments.
